# Supplementary material for: BoLA-DRB3 Polymorphism Associated with Bovine Leukemia Virus Infection and Proviral Load in Holstein Cattle in Egypt
Source: MDPI journal article supplement (doi:10.3390/pathogens12121451), 2023-12-14
Supplement: s1 [file s1]

**Table S2. Sequences of the used primer/probe in this study.**

| Target                    | Primer/probe ID             | Primer sequence 5'-3'                                                                  | Reference                                      |
|---------------------------|-----------------------------|----------------------------------------------------------------------------------------|------------------------------------------------|
| 1) BLV-PVL-COCOMO- qPCR-2 |                             |                                                                                        |                                                |
| BLV-LTR                   | CoCoMo-FRW                  | AATCCMNMICYKDAGCTGCTGAYYTCACCT<br>ATCCACACCCTGAGCTGCTGCACCTCACCT                       | Takeshima et al. (53)<br>Takeshima et al. (53) |
|                           | CoCoMo-REV<br>FAM-LTR probe | primers mixture 1:10<br>TTGCCTTACCTGMCSSCTKSCGGATAGCCGA<br>FAM-CTCAGCTCTCGGTCC-NFQ-MGB | Takeshima et al. (53)<br>Jimba et al. (15)     |
| BoLA-DRA                  | DRA-FW                      | CCCAGAGTATGAAGCTCCAGCCC                                                                | Takeshima et al. (53)                          |
|                           | DRA-RW                      | CCCTCGGCGTTCAACGGTGT                                                                   | Takeshima et al. (53)                          |
|                           | FAM-DRA probe               | FAM-TGTGTGCCCTGGGC -NFQ-MGB                                                            | Takeshima et al. (53)                          |
| 2) BoLA-DRB3 Genotyping   |                             |                                                                                        |                                                |
| BoLA-DRB3                 | DRB3FRW                     | CGCTCCTGTGAYCAGATCTATCC                                                                | Takeshima et al. (55)                          |
|                           | DRB3REV                     | CACCCCCGCGCTCACC                                                                       | Takeshima et al. (55)                          |
